# Supplementary material for: Biosynthesis of Ascorbic Acid as a Glucose-Induced Photoprotective Process in the Extremophilic Red Alga Galdieria partita
Source: Front Microbiol. 2020 Jan 14;10:3005. doi: 10.3389/fmicb.2019.03005 (PMC6971183; doi:10.3389/fmicb.2019.03005)
Supplement: Supplementary file 2 [file Data_Sheet_2.xlsx]

## Sheet: Data matrix
Table S3 | Basic metrics of the transcriptome data deposited into the Sequence Read Archive of NCBI (SRA accession: PRJNA507473)
accession	study	bioproject_accession	biosample_accession	sample_name	library_ID	title	library_strategy	library_source	library_selection	library_layout	platform	instrument_model	design_description		filename	filename2	Yield (Mbases)	# of Reads	% Raw Clusters	% Perfect	% One Mismatch	% of Bases	Mean Quality
														filetype					per Lane	Index Reads	Index Reads	>= Q30 (PF)	Score (PF)
SRR8259112	SRP171081	PRJNA507473	SAMN10496231	GpDark	GpD	RNASeq of Galdieria partita:Dark	RNA-Seq	TRANSCRIPTOMIC	cDNA	paired	ILLUMINA	Illumina HiSeq 2500	RNA was isolated using Direct-zol RNA MiniPrep; the library was prepared using TruSeq Stranded mRNA Library Prep (poly-A)	fastq	LTS17_LS01_366bp_ACAGTG_L001_R1.fastq.gz	LTS17_LS01_366bp_ACAGTG_L001_R2.fastq.gz	3973	26312754	6.6	99.21	0.79	95.81	37.92
SRR8259111	SRP171081	PRJNA507473	SAMN10496232	GpLL	GpLL	RNASeq of Galdieria partita:LL	RNA-Seq	TRANSCRIPTOMIC	cDNA	paired	ILLUMINA	Illumina HiSeq 2500	RNA was isolated using Direct-zol RNA MiniPrep; the library was prepared using TruSeq Stranded mRNA Library Prep (poly-A)	fastq	LTS17_LS02_362bp_GCCAAT_L001_R1.fastq.gz	LTS17_LS02_362bp_GCCAAT_L001_R2.fastq.gz	4217	27925394	7.01	99.02	0.98	95.99	37.96
SRR8259114	SRP171081	PRJNA507473	SAMN10496233	GpDark+glu	GpDg	RNASeq of Galdieria partita:Dark+glu	RNA-Seq	TRANSCRIPTOMIC	cDNA	paired	ILLUMINA	Illumina HiSeq 2500	RNA was isolated using Direct-zol RNA MiniPrep; the library was prepared using TruSeq Stranded mRNA Library Prep (poly-A)	fastq	LTS17_LS03_376bp_CAGATC_L001_R1.fastq.gz	LTS17_LS03_376bp_CAGATC_L001_R2.fastq.gz	3754	24859994	6.24	99.14	0.86	94.88	37.63
SRR8259113	SRP171081	PRJNA507473	SAMN10496234	GpLL+glu	GpLLg	RNASeq of Galdieria partita:LL+glu	RNA-Seq	TRANSCRIPTOMIC	cDNA	paired	ILLUMINA	Illumina HiSeq 2500	RNA was isolated using Direct-zol RNA MiniPrep; the library was prepared using TruSeq Stranded mRNA Library Prep (poly-A)	fastq	LTS17_LS04_362bp_CTTGTA_L001_R1.fastq.gz	LTS17_LS04_362bp_CTTGTA_L001_R2.fastq.gz	4146	27457698	6.89	99.22	0.78	96.15	38.01
SRR8259115	SRP171081	PRJNA507473	SAMN10496235	GpHL+glu	GpHLg	RNASeq of Galdieria partita:HL+glu	RNA-Seq	TRANSCRIPTOMIC	cDNA	paired	ILLUMINA	Illumina HiSeq 2500	RNA was isolated using Direct-zol RNA MiniPrep; the library was prepared using TruSeq Stranded mRNA Library Prep (poly-A)	fastq	LTS17_LS05_368bp_GTGAAA_L001_R1.fastq.gz	LTS17_LS05_368bp_GTGAAA_L001_R2.fastq.gz	3961	26230060	6.58	99.36	0.64	96.01	37.95
